# Supplementary material for: Comparative experimental validation of microwave hyperspectral atmospheric soundings in clear-sky conditions
Source: Copernicus journal article supplement (doi:10.5194/egusphere-2024-1045), 2024-05-28
Supplement: Supplementary file 1 [file egusphere-2024-1045-supplement.pdf]

# Supplement of “Comparative experimental validation of microwave hyperspectral atmospheric soundings in clear-sky conditions”

Lei Liu<sup>1</sup>, Natalia Bliankinshtein<sup>2</sup>, Yi Huang<sup>1</sup>, John R. Gyakum<sup>1</sup>, Philip M. Gabriel<sup>3</sup>, Shiqi Xu<sup>2</sup>, Mengistu Wolde<sup>2</sup>

5 <sup>1</sup>Department of Atmospheric and Oceanic Sciences, McGill University, Montreal, Quebec, Canada

<sup>2</sup>Flight Research Laboratory, National Research Council Canada, Ottawa, Ontario, Canada

<sup>3</sup>Horizon Science and Technology, Wolfville, Nova Scotia, Canada

*Correspondence to:* Lei Liu ([lei.liu5@mail.mcgill.ca](mailto:lei.liu5@mail.mcgill.ca))

10 This supplemental document presents the vertical level adopted and main matrices used in this study, including  $S_e$ ,  $S_a$ , and  $K$  at selected levels.

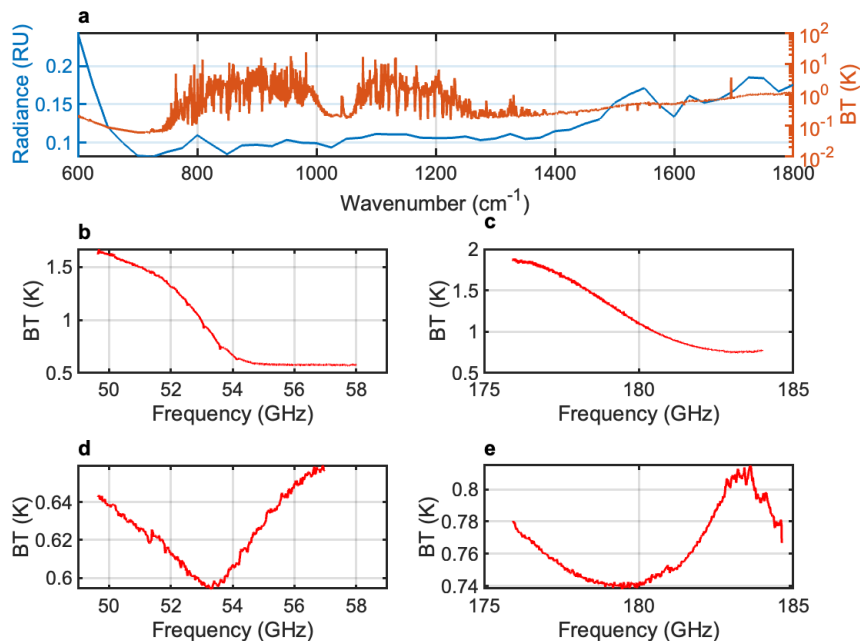

15 **Figure S1.** The square root of the diagonal components of  $S_e$  for AERI measurements (a), HiSRAMS nadir-pointing measurements at 6.8 km in the oxygen band (b) and in the water vapor band (c), and HiSRAMS zenith-pointing measurements at the surface in the oxygen band (d) and in the water vapor band (e).

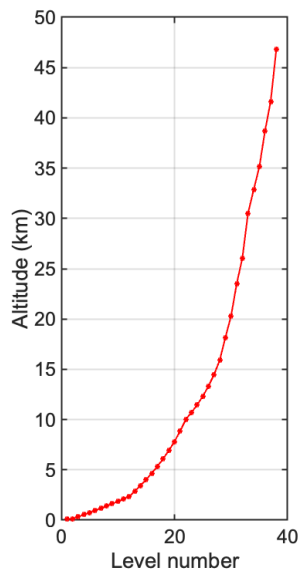

**Figure S2.** The vertical levels adopted in this study for all the retrievals. We utilize altitude coordinates for the retrievals, determined by averaging the geopotential heights from the a priori dataset.

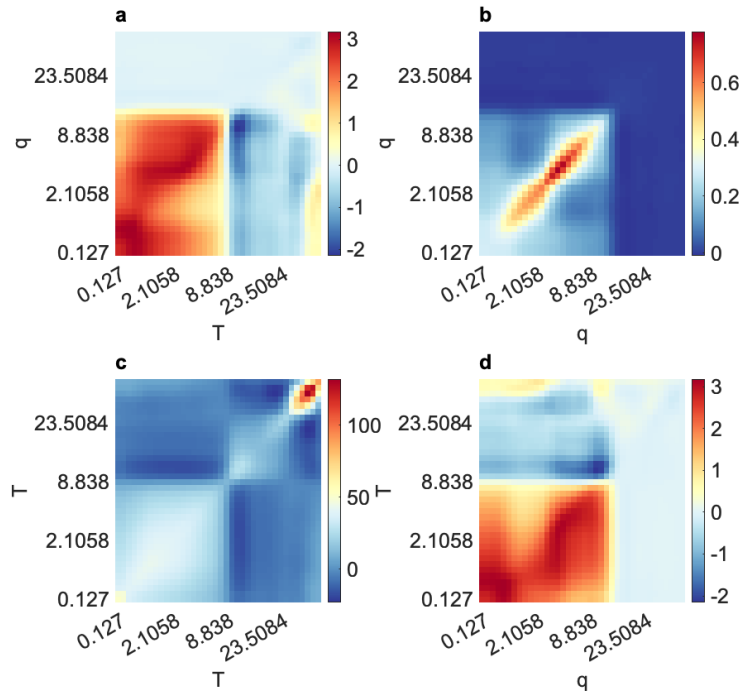

**Figure S3.** A priori covariance matrix  $S_\alpha$ . Here, the label T represents temperature, and q represents the logarithm of the water vapor concentration. All units along the axes are in km.

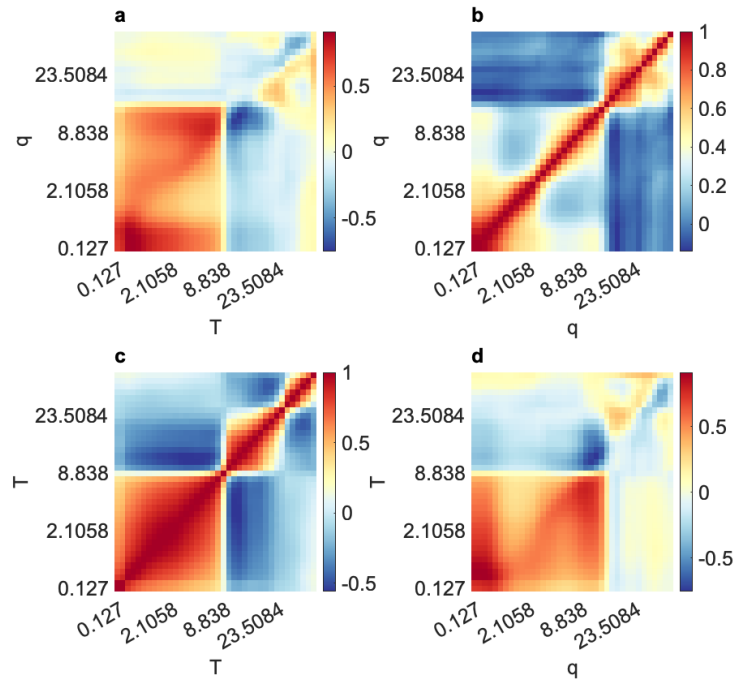

25 **Figure S4.** A priori correlation coefficient matrix  $C_a$ . Here, the label T represents temperature, and q represents the logarithm of the water vapor concentration. All units along the axes are in km.

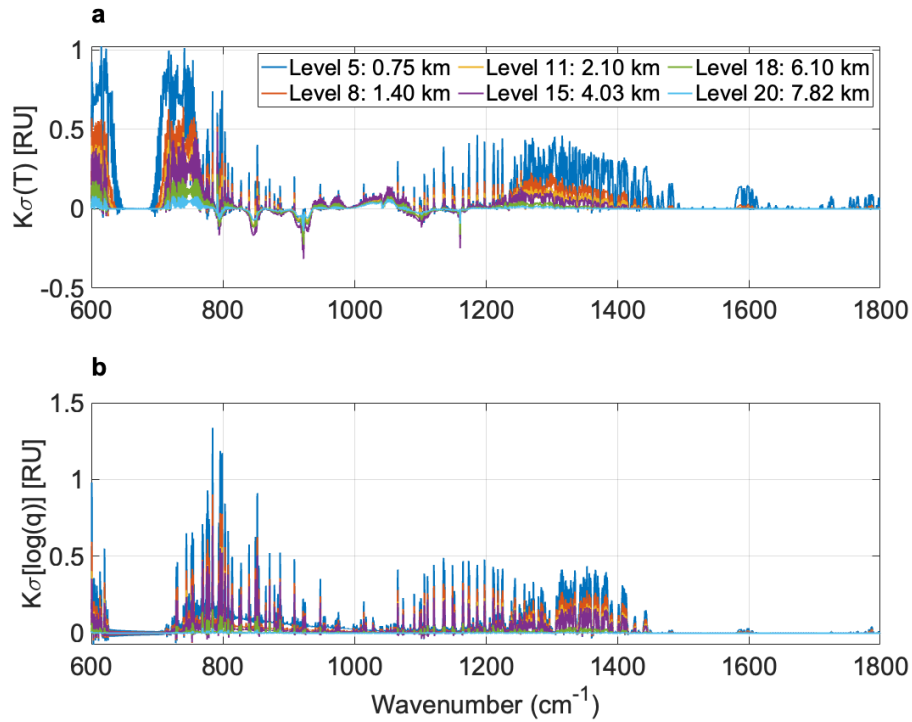

30 **Figure S5. (a)  $K_{AERI,T} \times \sigma(T)$  at selected levels. This shows the product of the temperature Jacobian,  $K_{AERI,T}$ , and the standard deviation of the temperature profiles in the a priori dataset,  $\sigma(T)$ . (b)  $K_{AERI,q} \times \sigma[\log(q)]$  at selected levels. This presents the product of the water vapor Jacobian,  $K_{AERI,q}$ , and the standard deviation of the water vapor concentration profiles in the a priori dataset,  $\sigma[\log(q)]$ . Note that we use the logarithm of water vapor concentration to calculate the water vapor Jacobian.**

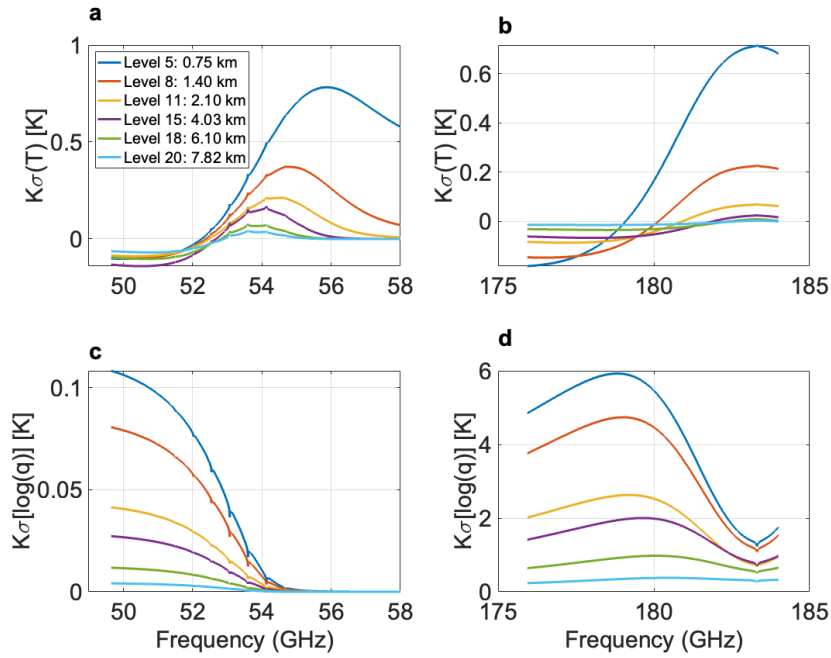

35 **Figure S6.** The same as Figure S5 but for HiSRAMS ground based zenith-pointing Jacobians. (a)  $K_{\text{HiSRAMS},T} \times \sigma(T)$  in the oxygen band. (b)  $K_{\text{HiSRAMS},T} \times \sigma(T)$  in the water vapor band. (c)  $K_{\text{HiSRAMS},q} \times \sigma[\log(q)]$  in the oxygen band. (d)  $K_{\text{HiSRAMS},q} \times \sigma[\log(q)]$  in the water vapor band.

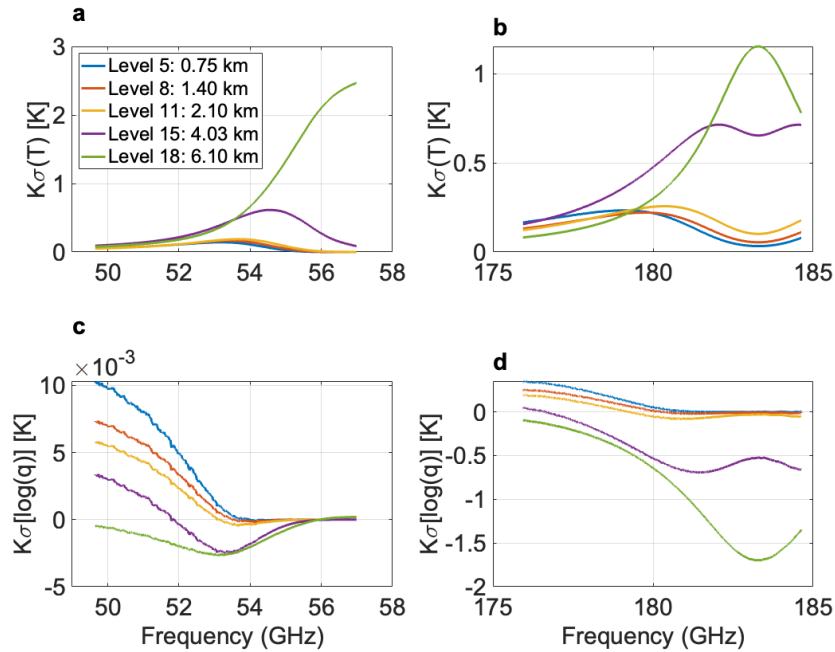

**Figure S7.** The same as Figure S6 but for HiSRAMS airborne nadir-pointing Jacobians. The observational height is set at 6.8 km.
